# Supplementary material for: The cancer/testis antigen HORMAD1 mediates epithelial–mesenchymal transition to promote tumor growth and metastasis by activating the Wnt/β-catenin signaling pathway in lung cancer
Source: PubMed Central journal article supplement (PMC8960869; doi:10.1038/s41420-022-00946-1), 2022-03-28

Original western blots in Figure 1C

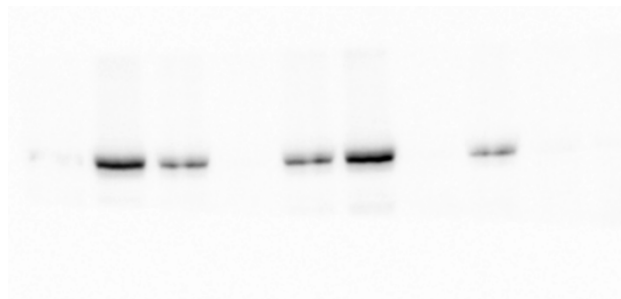

HORMAD1

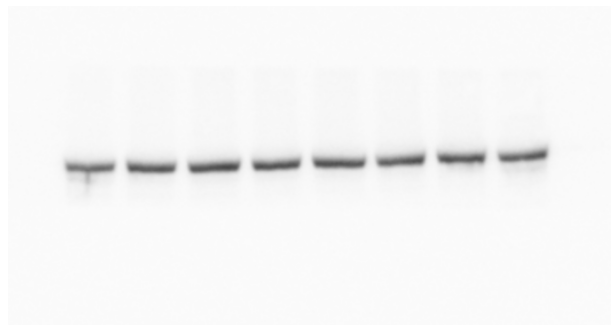

$\alpha$  -tubulin

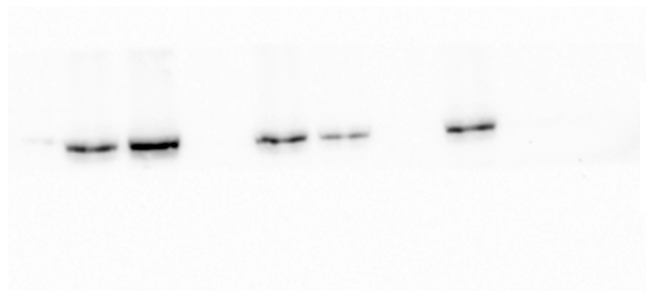

HORMAD1

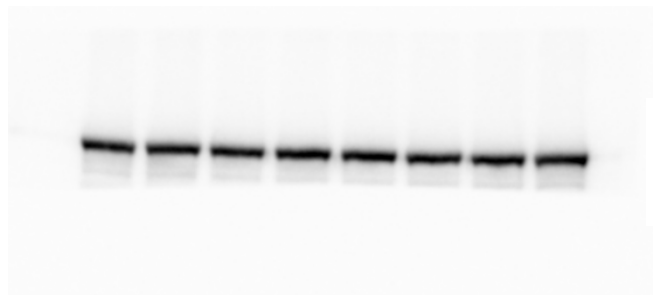

$\alpha$  -tubulin

Original western blots in Figure 2A

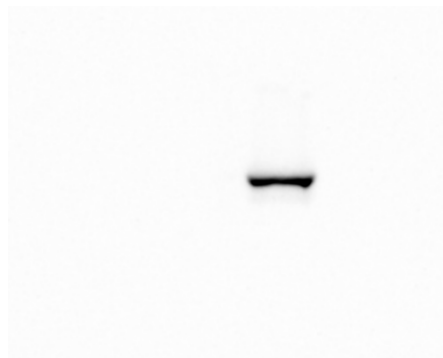

FLAG

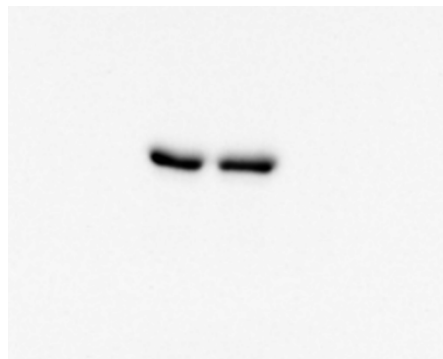

$\alpha$ -tubulin

Original western blots in Figure 2B

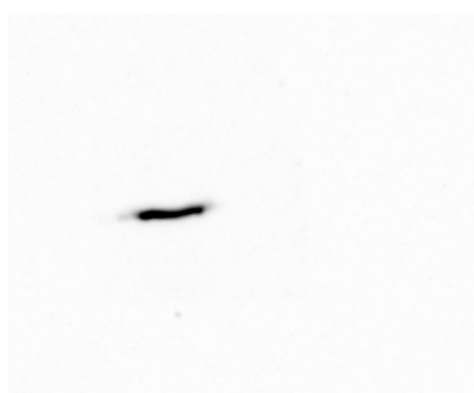

HORMAD1

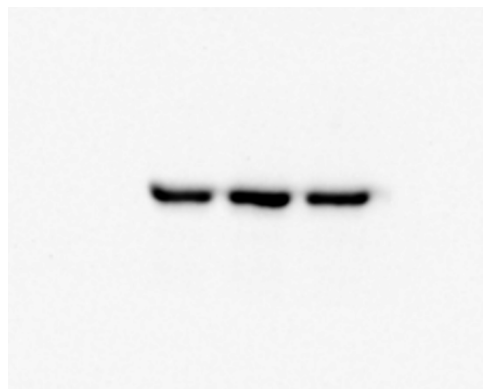

$\alpha$ -tubulin

Original western blots in Figure 4C

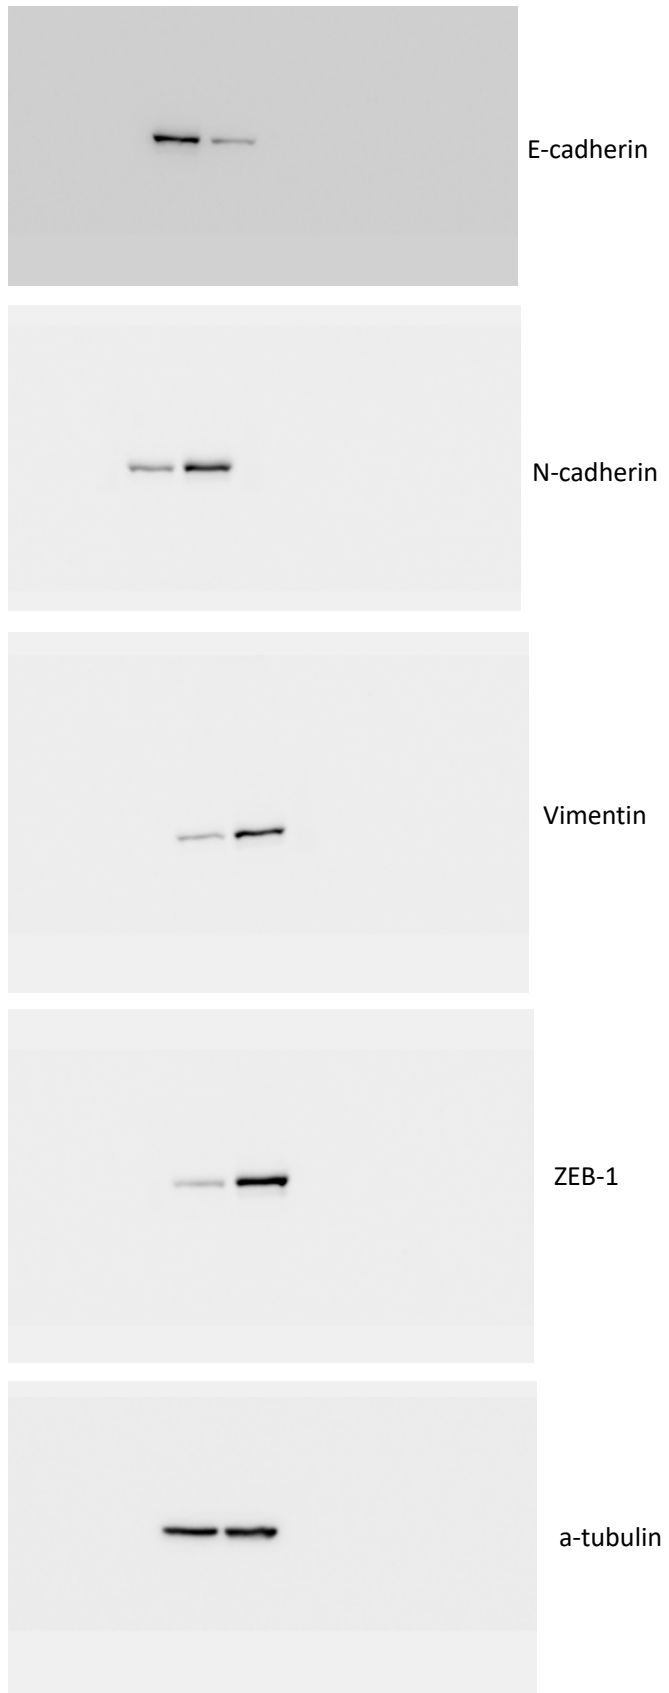

Original western blots in Figure 4D

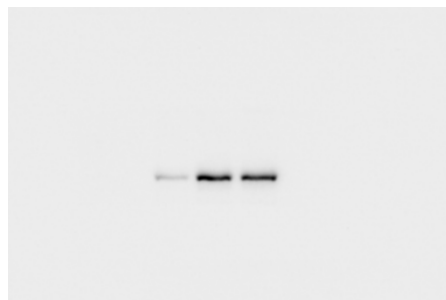

E-cadherin

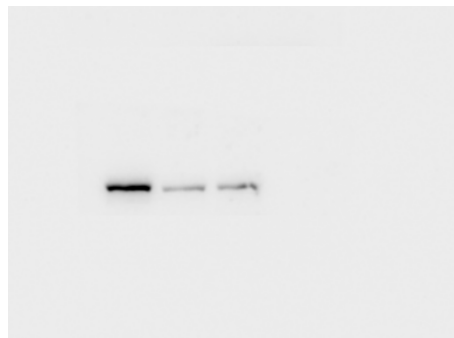

N-cadherin

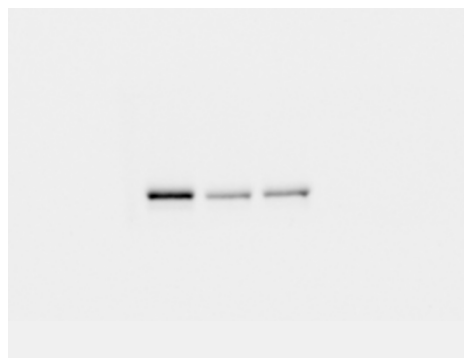

Vimentin

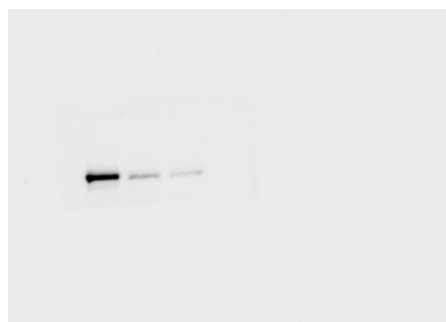

ZEB-1

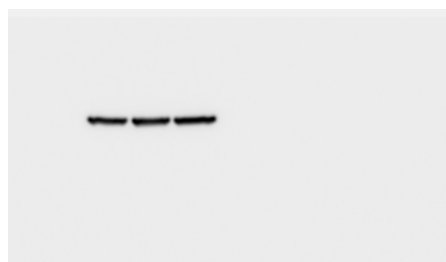

$\alpha$ -tubulin

Original western blots in Figure 4G

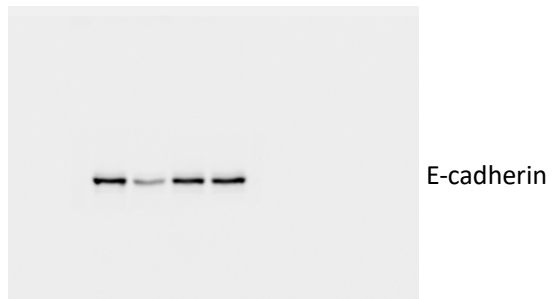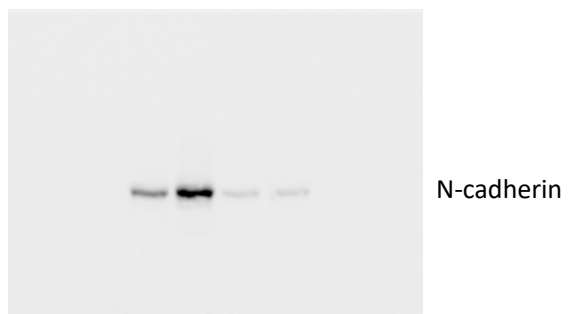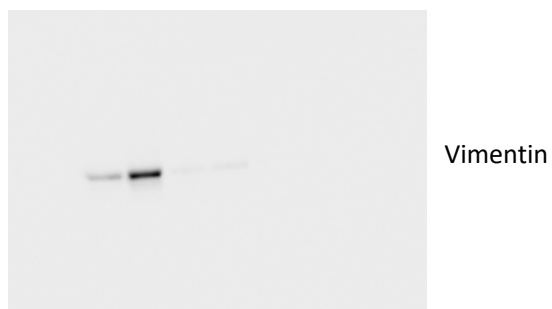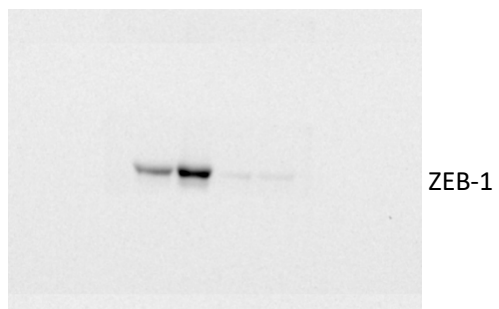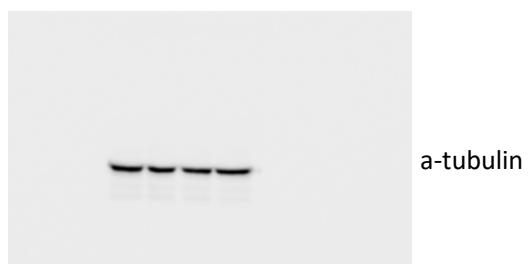

Original western blots in Figure 4H

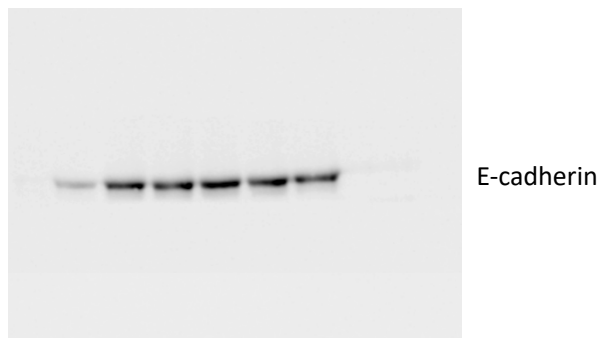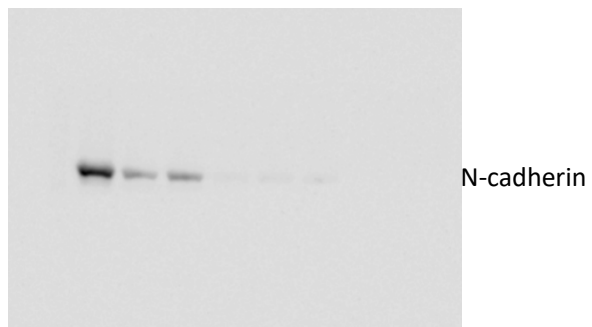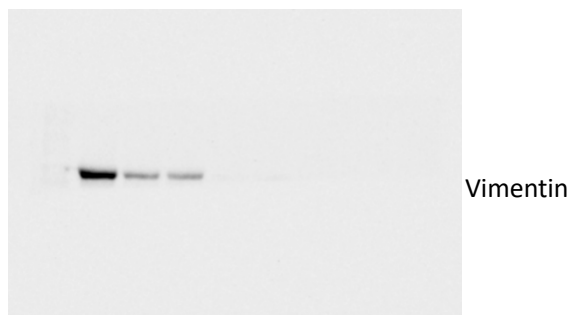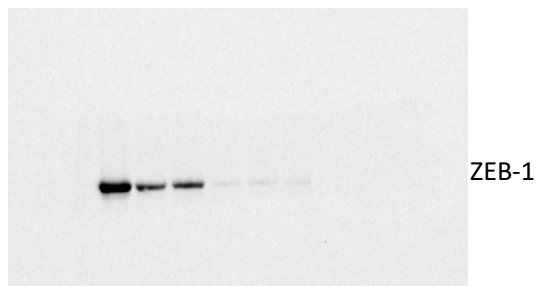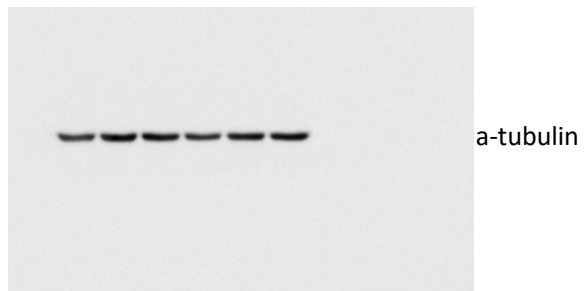

Original western blots in Figure 5A

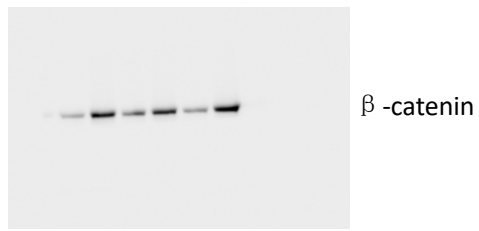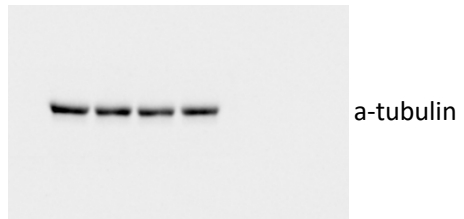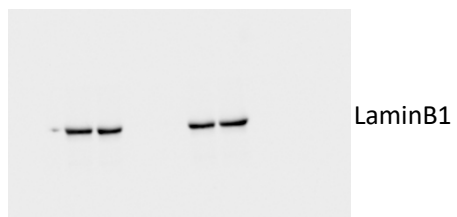

Original western blots in Figure 5B

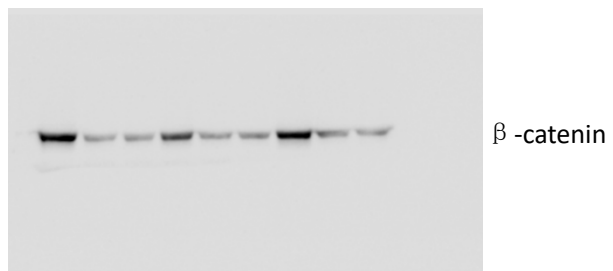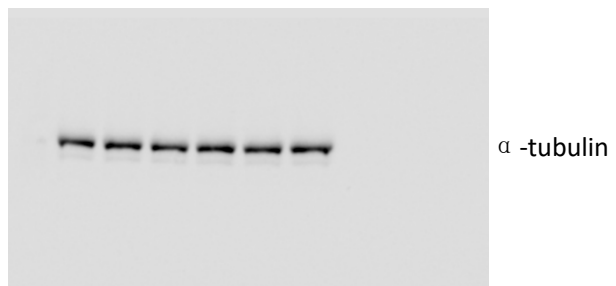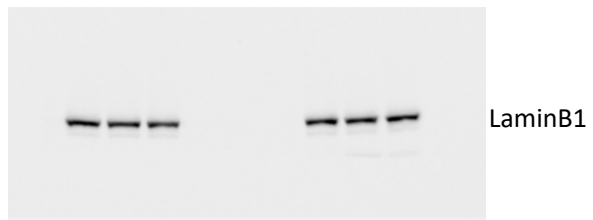

Original western blots in Figure 5I

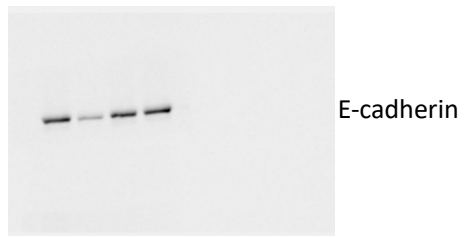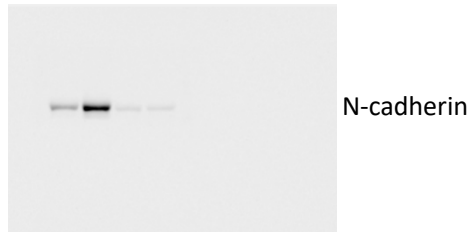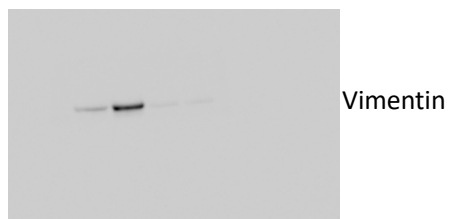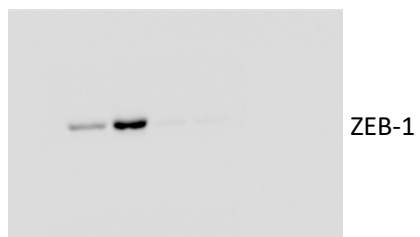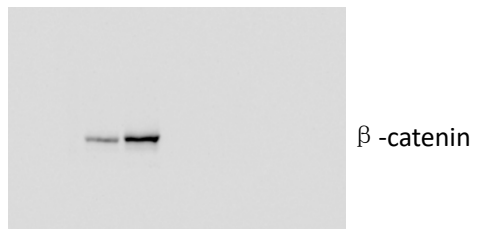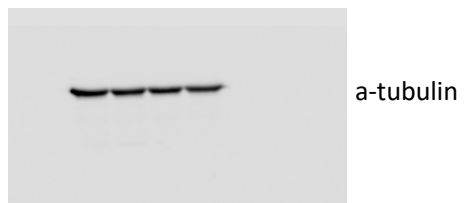



Original western blots in Figure 5J

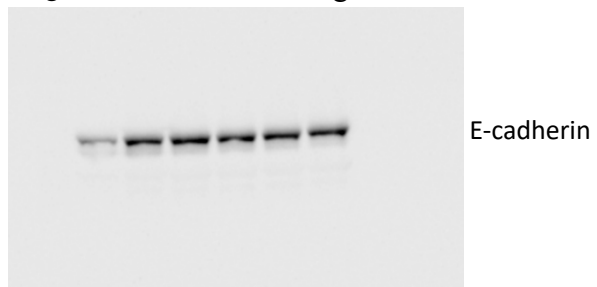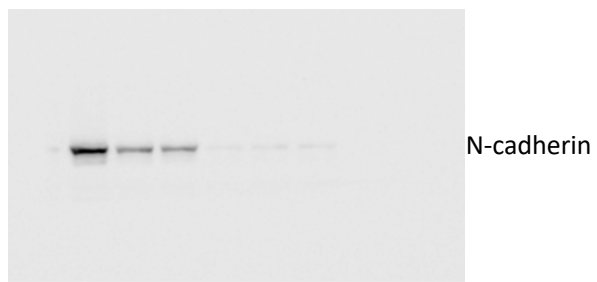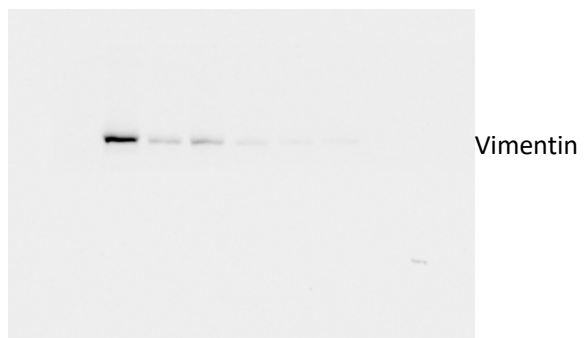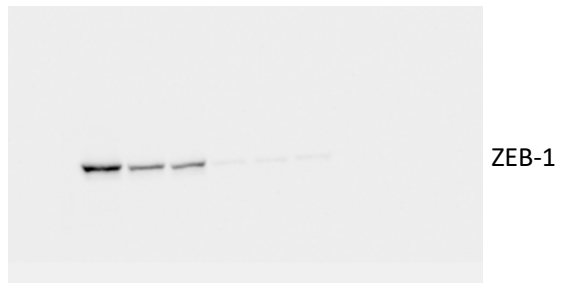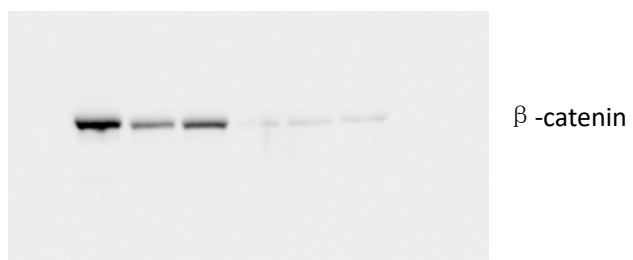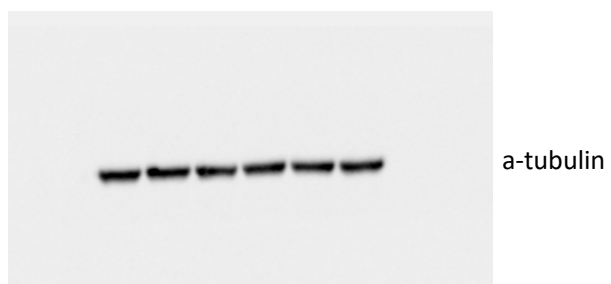

Original western blots in Figure 6A

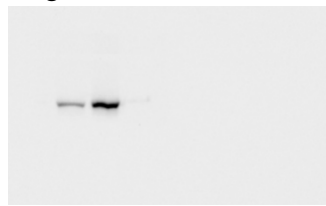

$\beta$ -catenin

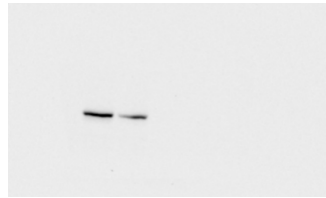

p- $\beta$ -catenin

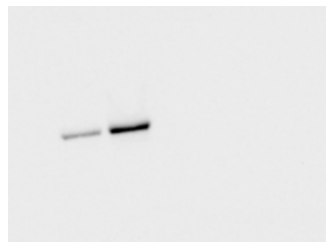

p-GSK3 $\beta$

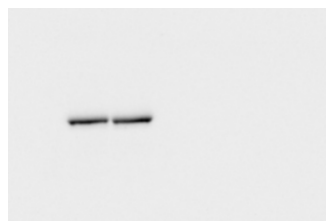

GSK3 $\beta$

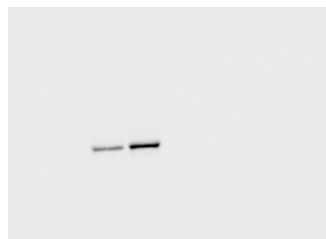

p-AKT

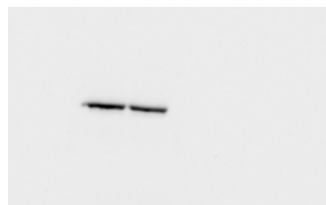

AKT

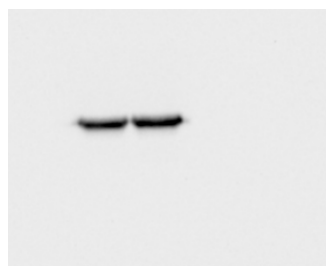

$\alpha$ -tubulin

Original western blots in Figure 6B

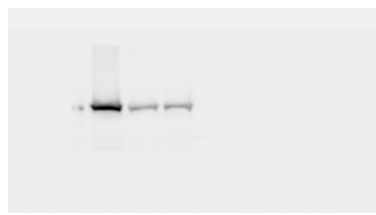

$\beta$ -catenin

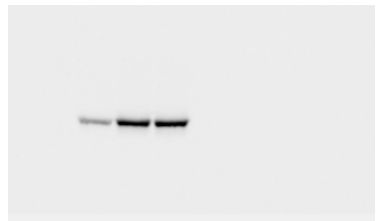

p- $\beta$ -catenin

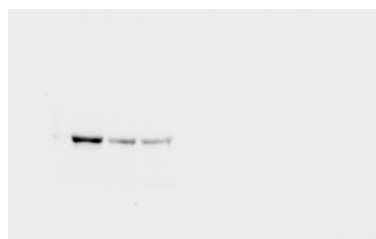

p-GSK3 $\beta$

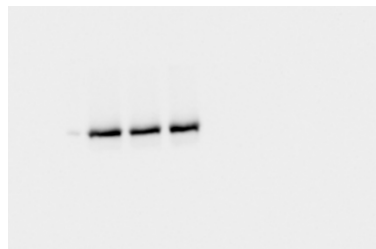

GSK3 $\beta$

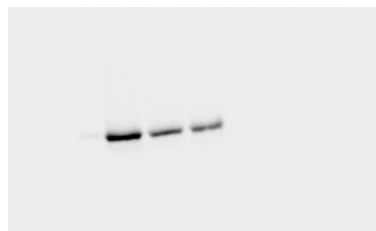

p-AKT

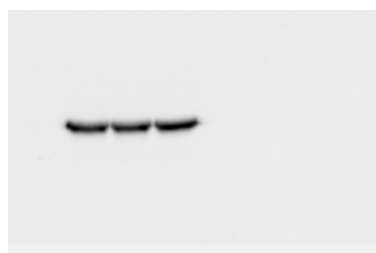

AKT

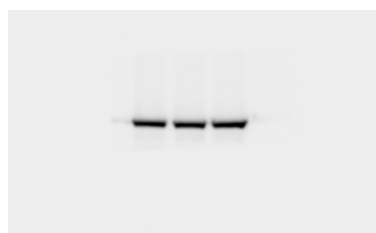

$\alpha$ -tubulin

Original western blots in Figure 6C

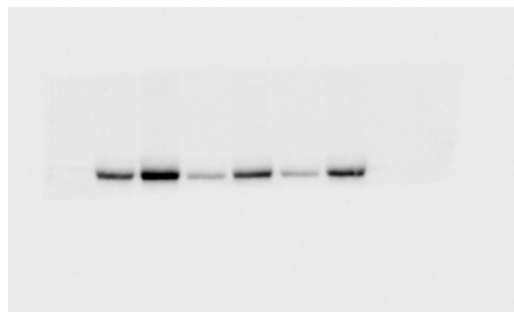

p-GSK3 $\beta$

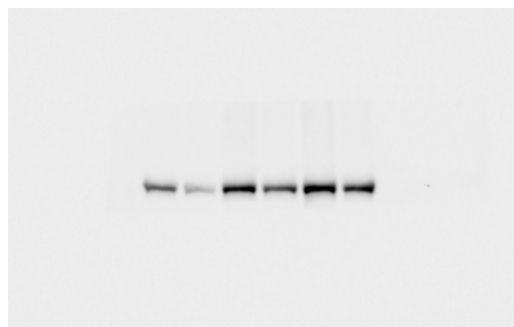

p- $\beta$ -catenin

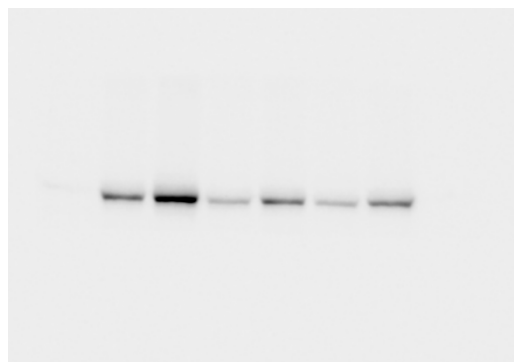

$\beta$ -catenin

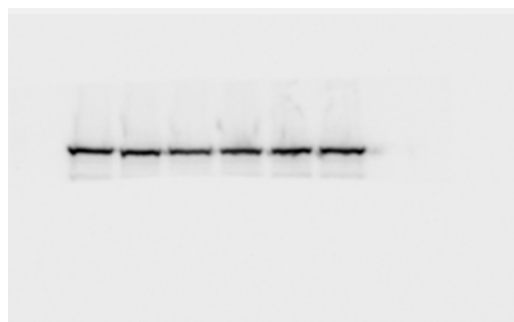

GSK3 $\beta$

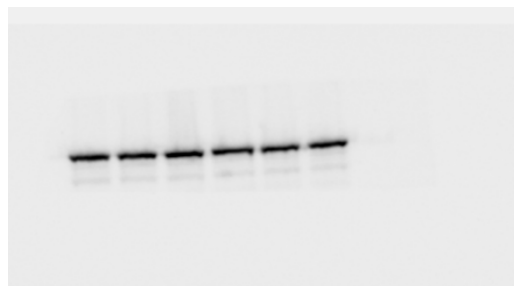

$\alpha$ -tubulin

Original western blots in Figure 6D

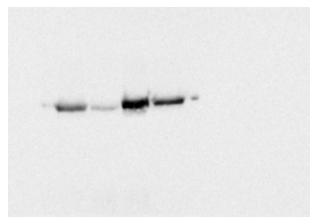

p-AKT

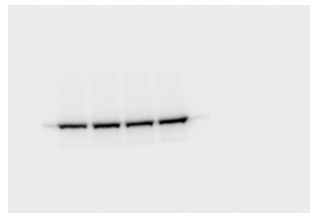

AKT

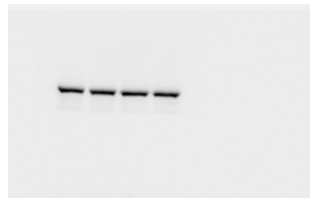

GSK-3  $\beta$

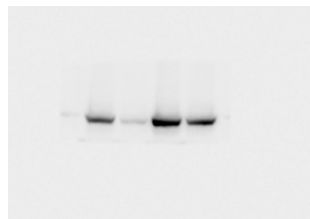

p-GSK-3  $\beta$

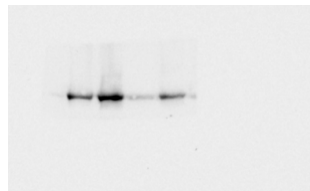

p- $\beta$ -catenin

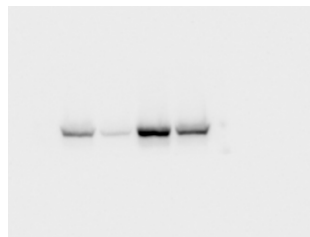

$\beta$ -catenin

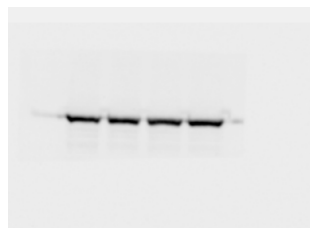

$\alpha$ -tubulin

Original western blots in Figure 7A

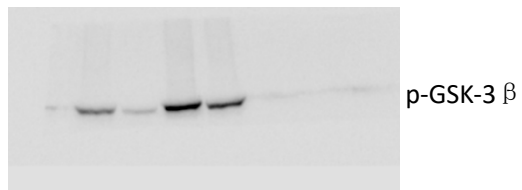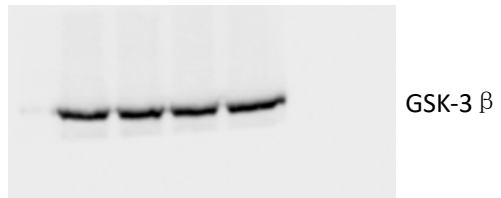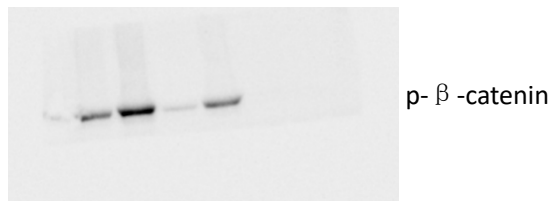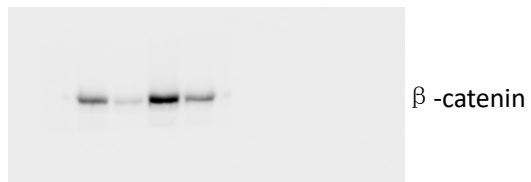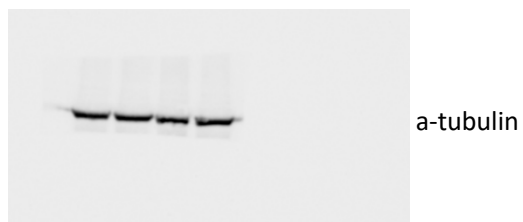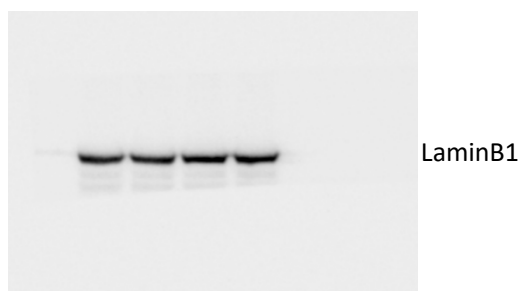

Original western blots in Figure 7B

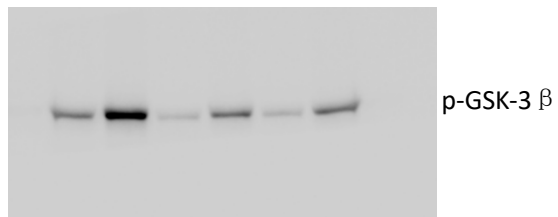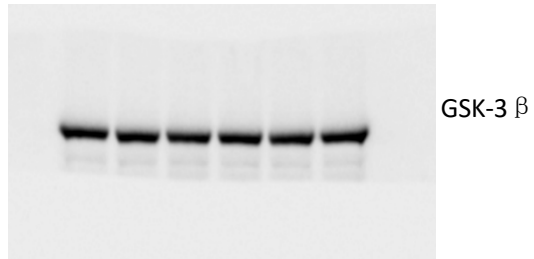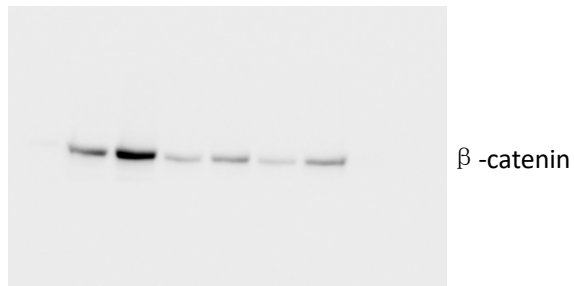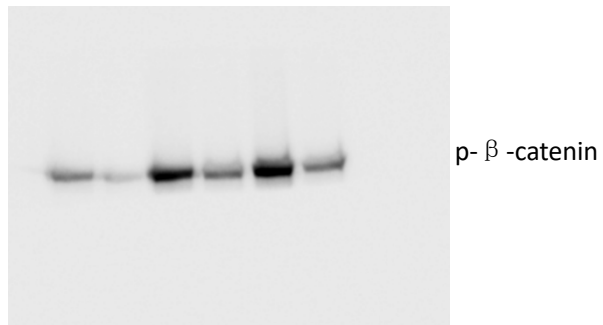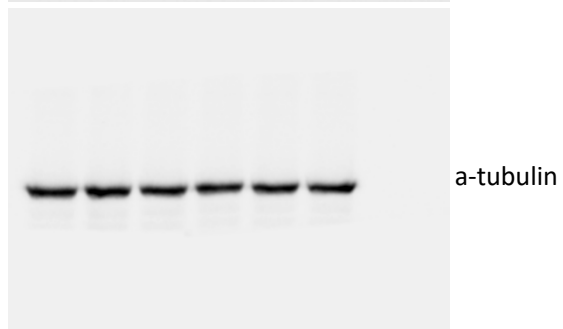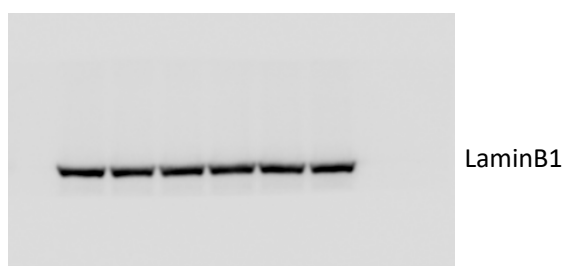

Original western blots in Figure 7E

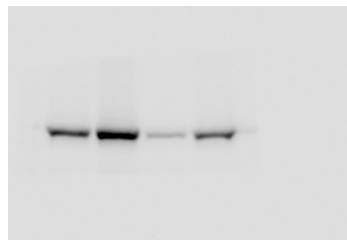

E-cadherin

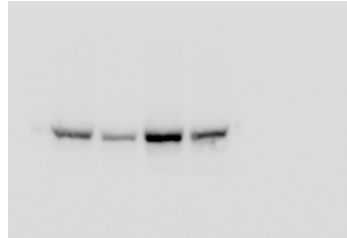

N-cadherin

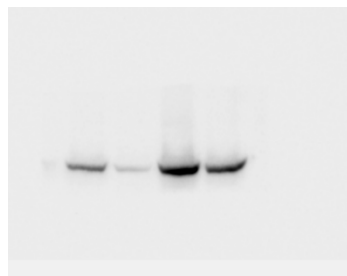

Vimentin

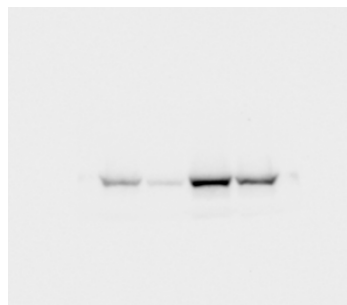

ZEB-1

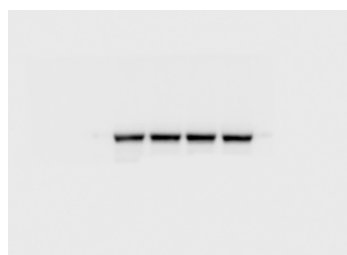

α-tubulin



Original western blots in Figure 7F

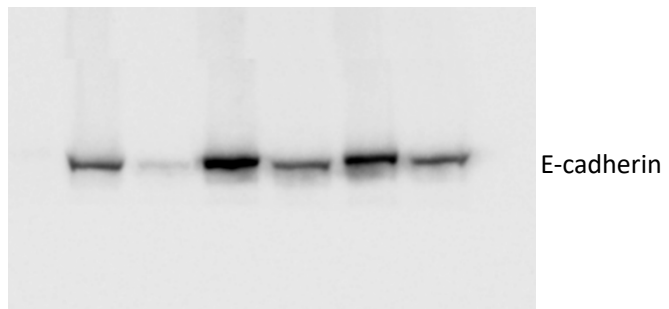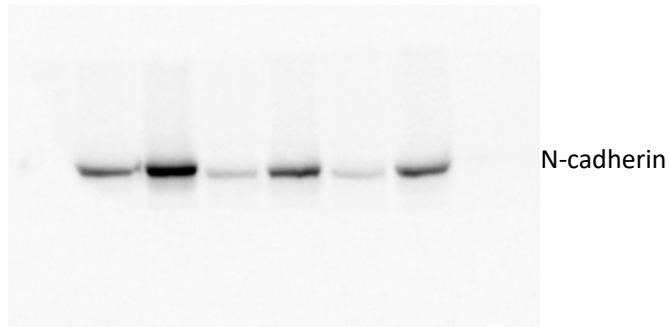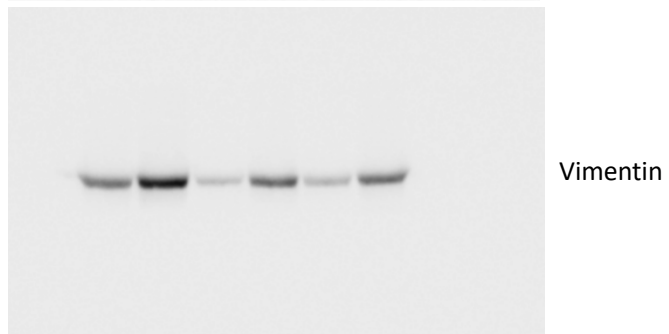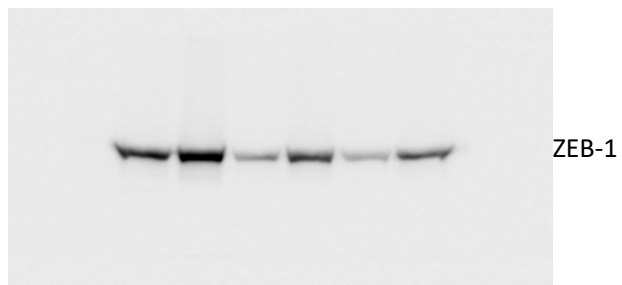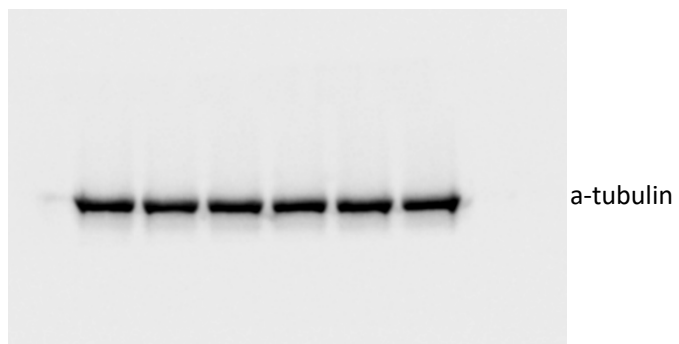

Original western blots in Figure S1A

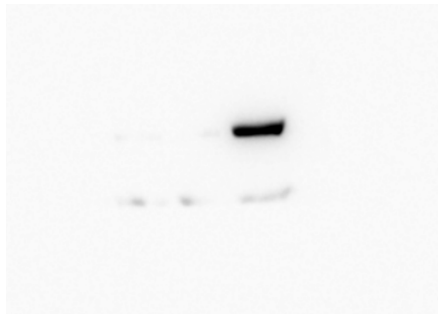

FLAG

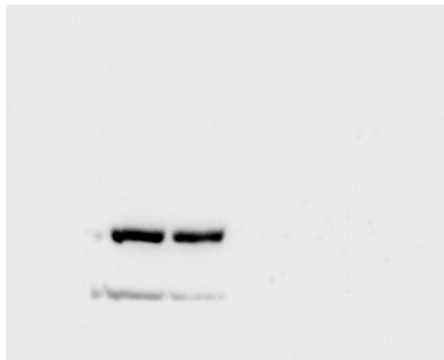

α-tubulin

Original western blots in Figure S1B

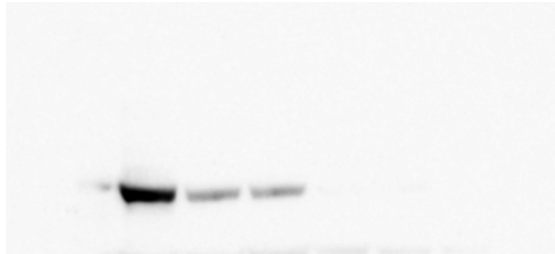

HORMAD1

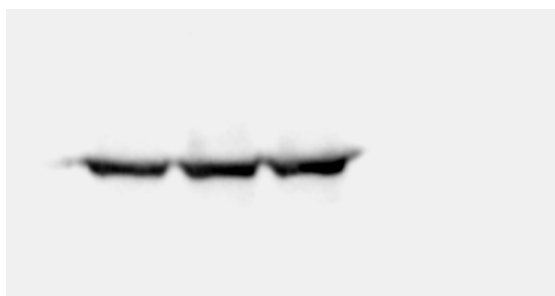

α-tubulin

Original western blots in Figure S2A

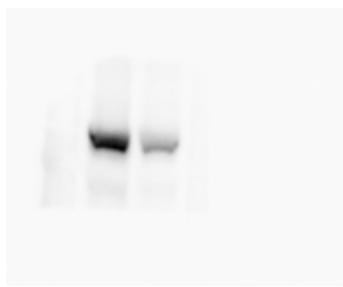

E-cadherin

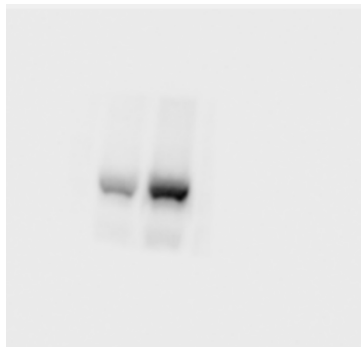

N-cadherin

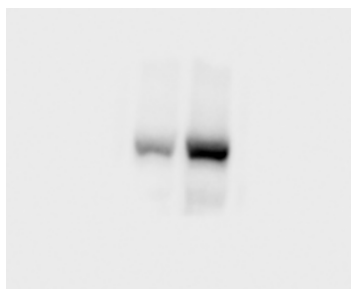

Vimentin

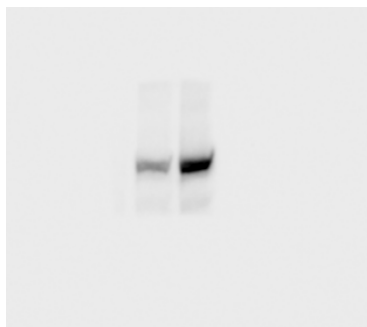

ZEB-1

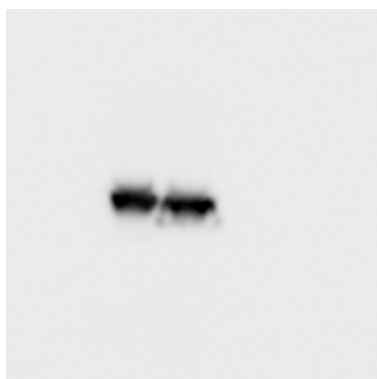

$\alpha$ -tubulin

Original western blots in Figure S2B

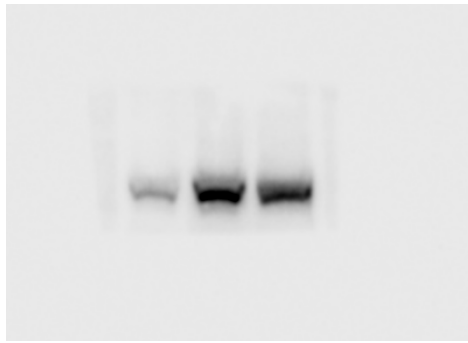

E-cadherin

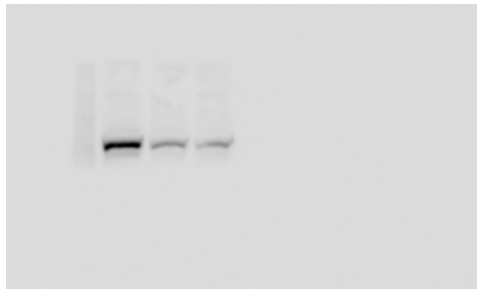

N-cadherin

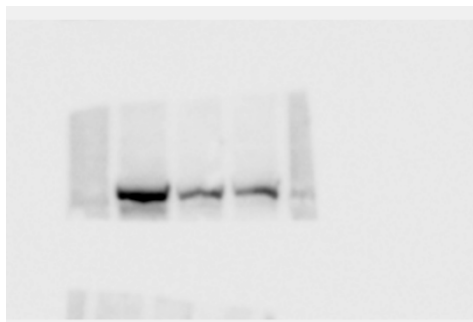

Vimentin

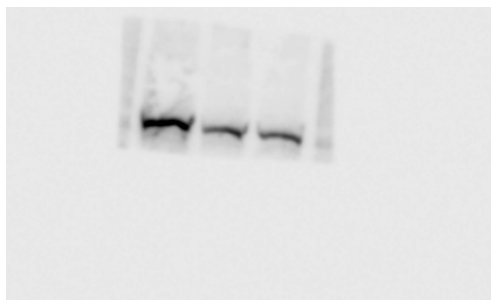

ZEB-1

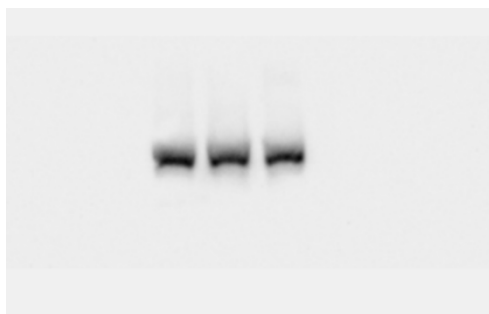

$\alpha$ -tubulin

Original western blots in Figure S2C

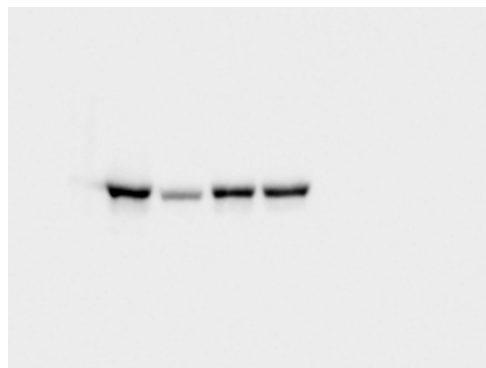

E-cadherin

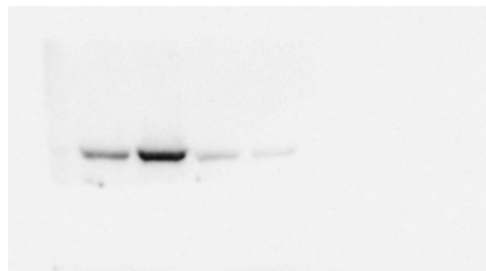

N-cadherin

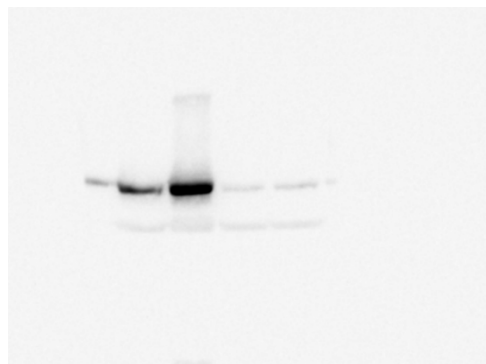

Vimentin

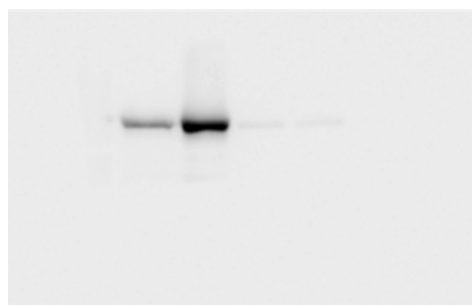

ZEB-1

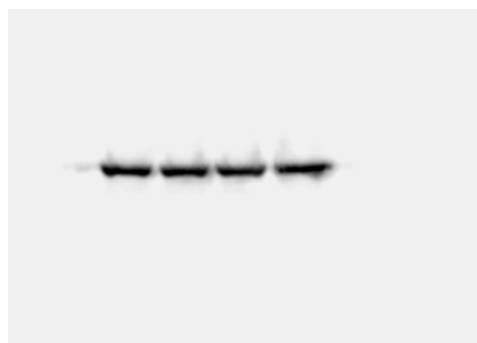

$\alpha$ -tubulin

Original western blots in Figure S2D

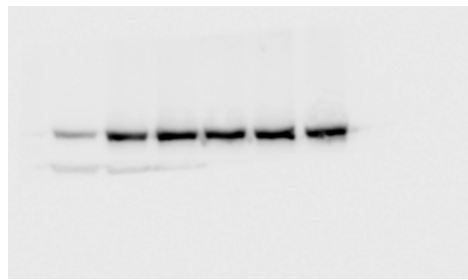

E-cadherin

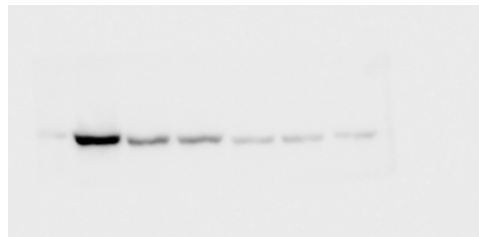

N-cadherin

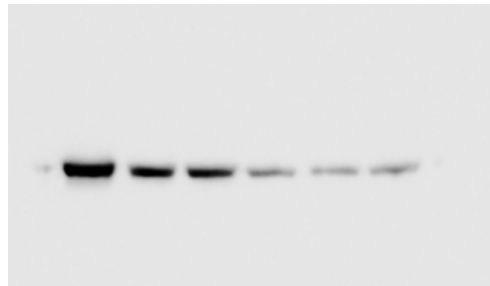

Vimentin

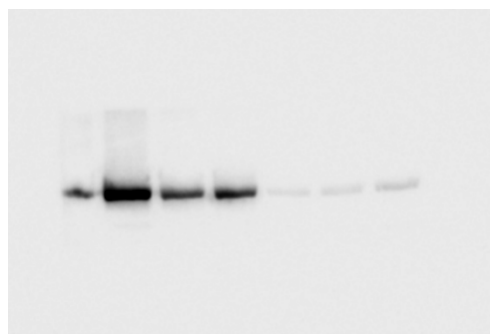

ZEB-1

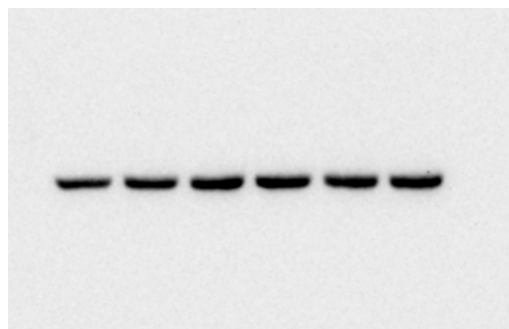

$\alpha$ -tubulin

Original western blots in Figure S3A

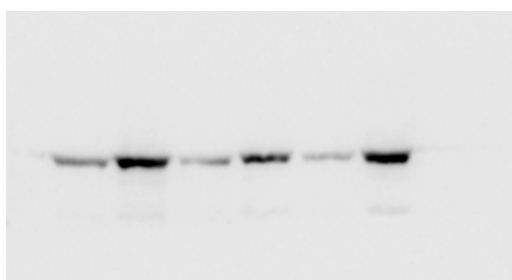

$\beta$ -catenin

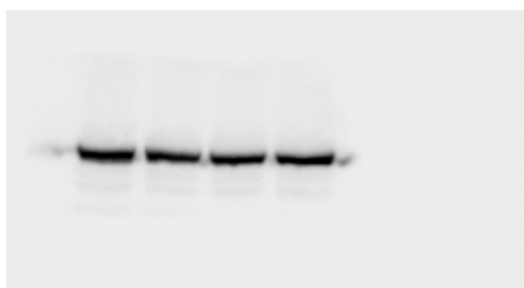

$\alpha$ -tubulin

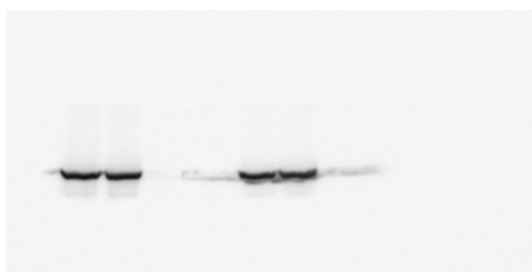

LaminB1

Original western blots in Figure S3B

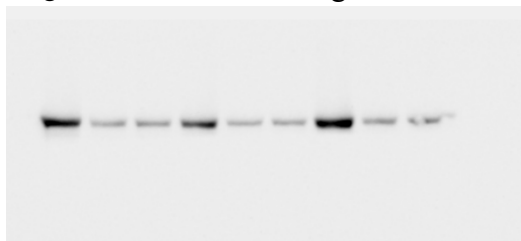

$\beta$ -catenin

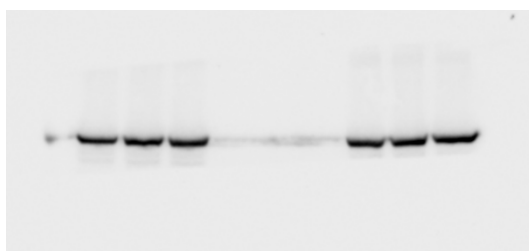

LaminB1

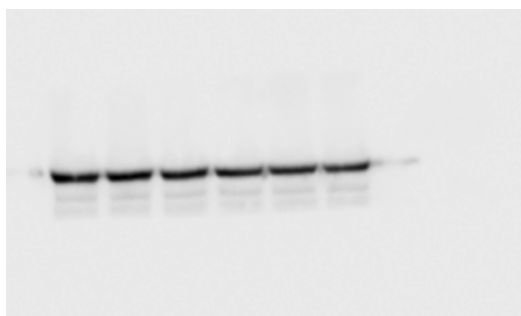

$\alpha$ -tubulin

Original western blots in Figure S3C

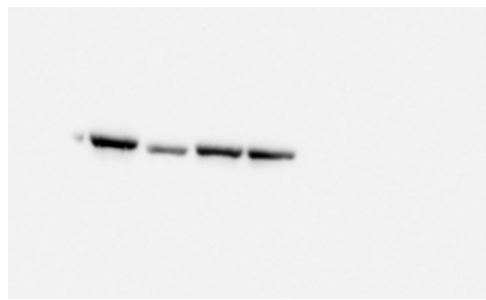

E-cadherin

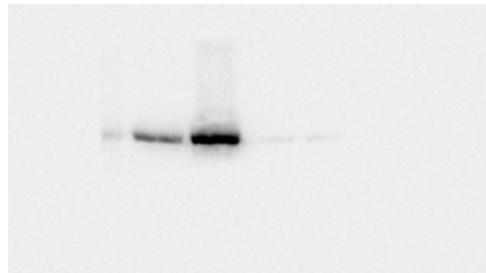

N-cadherin

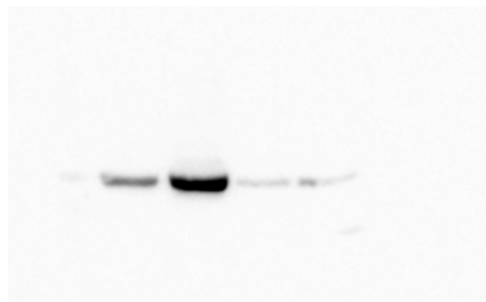

Vimentin

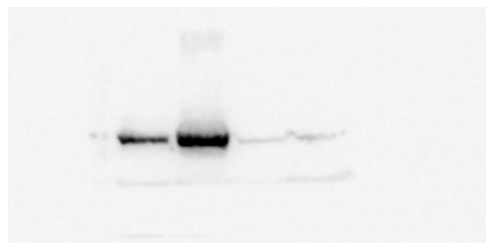

ZEB-1

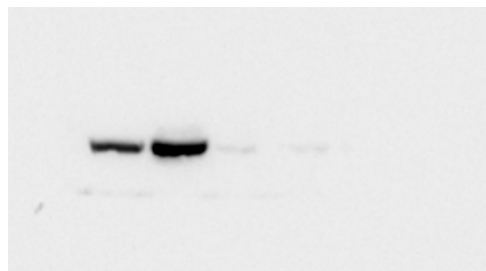

$\beta$ -catenin

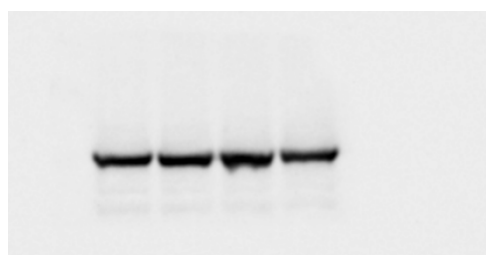

$\alpha$ -tubulin



Original western blots in Figure S3D

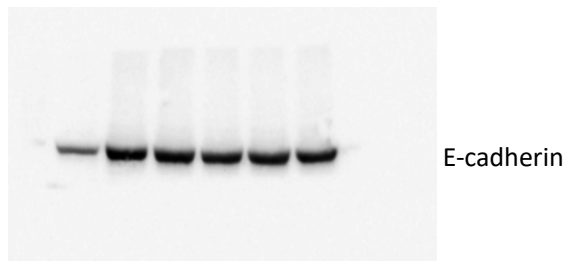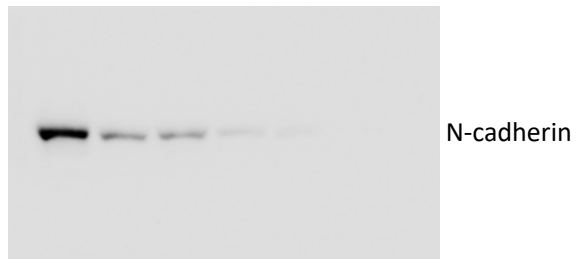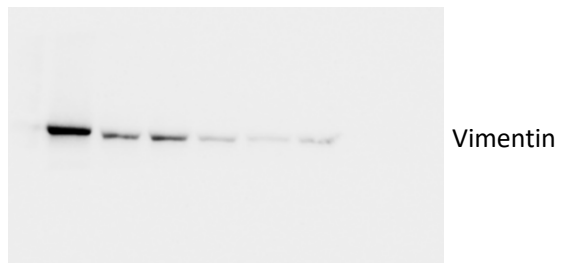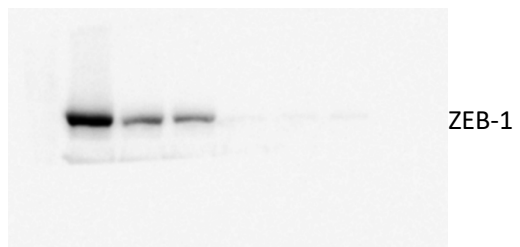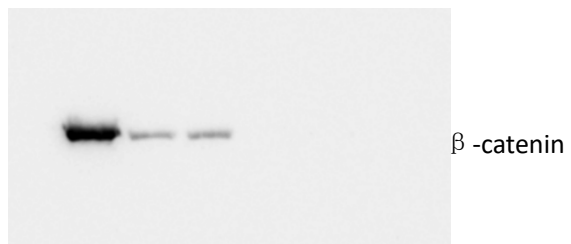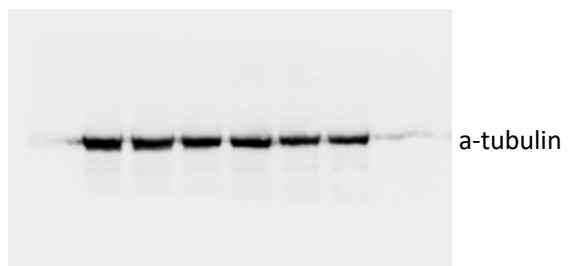

Supplement: 41420_2022_946_MOESM2_ESM.pdf [file 41420_2022_946_MOESM2_ESM.pdf]
