# Supplementary material for: The cancer/testis antigen HORMAD1 mediates epithelial–mesenchymal transition to promote tumor growth and metastasis by activating the Wnt/β-catenin signaling pathway in lung cancer
Source: PubMed Central journal article supplement (PMC8960869; doi:10.1038/s41420-022-00946-1), 2022-03-28
Supplement: 41420_2022_946_MOESM1_ESM.pdf [file 41420_2022_946_MOESM1_ESM.pdf]

## Supplementary Figures

Figure S1

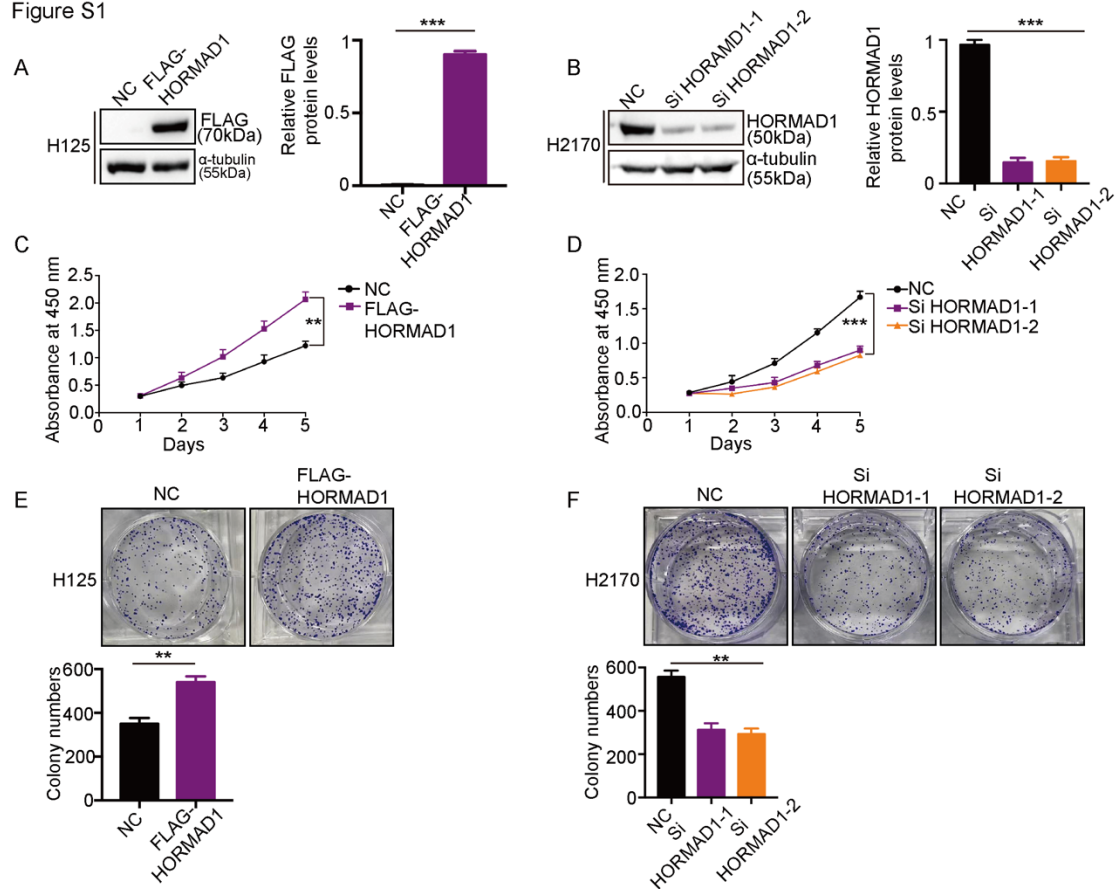

Figure S1. HORMAD1 promotes the proliferation of lung cancer cells *in vitro*.

**A.** Western blotting and quantitative analyses of HORMAD1 expression in H125 cells with or without HORMAD1 expression.  $\alpha$ -tubulin was used as the loading control. **B.** Western blotting and quantitative analyses of HORMAD1 expression in HORMAD1 negative control (NC) and knockdown H2170 cells.  $\alpha$ -tubulin was used as the loading control. **C-D.** The proliferation of H125 cells with or without HORMAD1 expression (**C**) and NC and HORMAD1 knockdown H2170 cells (**D**) was measured by CCK-8 assays at the indicated time points. **E-F.** The colony-forming ability of H125 cells with or without HORMAD1 expression (**E**) and NC and HORMAD1 knockdown H2170 cells (**F**) was measured by colony formation assays. All histograms representing

indicated the results of three independent experiments. Mean  $\pm$  SEM from three independent experiments are shown. \*\*,  $p < 0.01$ ; \*\*\*,  $p < 0.001$ .

Figure S2

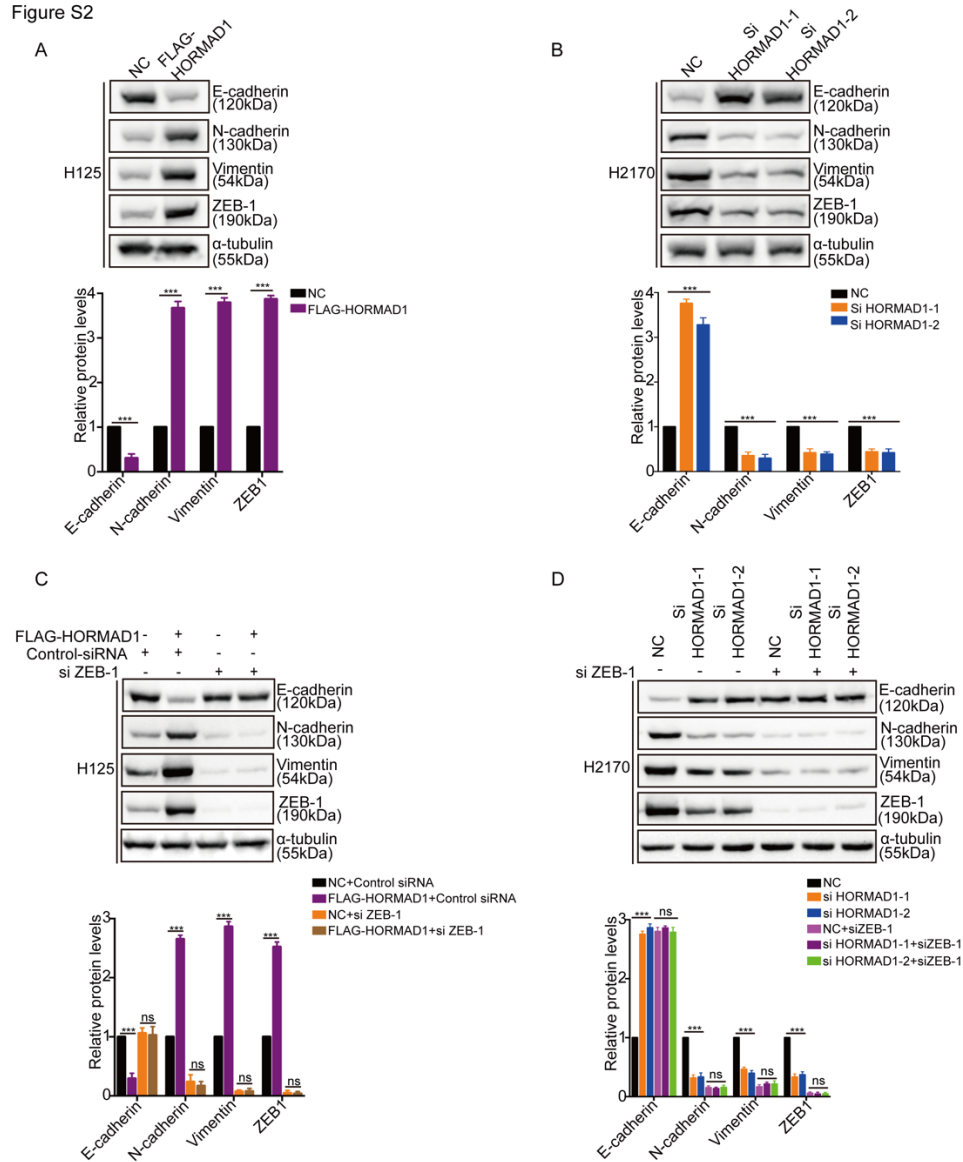

Figure S2. HORMAD1 promotes epithelial-mesenchymal transition (EMT) in lung cancer cells.

**A-B.** The protein levels of E-cadherin, N-cadherin, Vimentin, and ZEB-1 in H125 cells with or without HORMAD1 expression (A) and in NC and HORMAD1 knockdown

H2170 cells (B) were analyzed by western blotting. C-D. The protein levels of E-cadherin, N-cadherin, Vimentin, and ZEB-1 in H125 cells with or without HORMAD1 expression (C) and in NC and HORMAD1 knockdown H2170 cells (D) were analyzed by western blotting after transfection with ZEB-1 siRNA. All histograms representing indicated the results of three independent experiments. Mean  $\pm$  SEM from three independent experiments are shown. \*\*\*,  $p < 0.001$ ; ns, not significant.

Figure S3

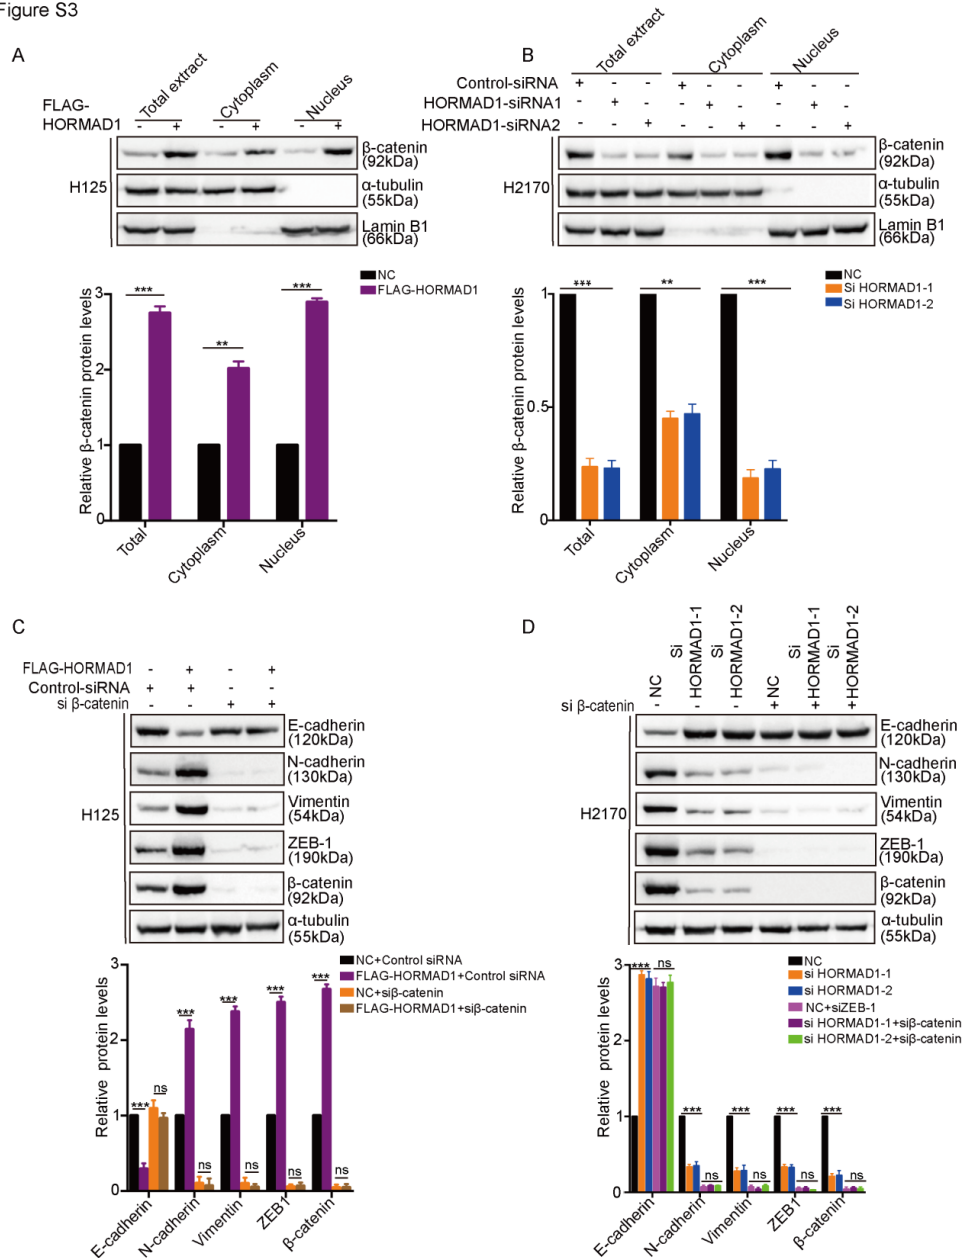

Figure S3. HORMAD1 activates the Wnt/ $\beta$ -catenin pathway in lung cancer cells.

**A-B.** Western blotting and quantitative analyses of total, cytosolic, and nuclear  $\beta$ -catenin in H125 cells with or without HORMAD1 expression (**A**) and in NC and HORMAD1 knockdown H2170 cells (**B**).  $\alpha$ -tubulin and Lamin B1 were used as the loading controls for the cytoplasmic and nuclear fractions, respectively. **C-D.** Western blotting and quantitative analyses of E-cadherin, N-cadherin, Vimentin, ZEB-1, and  $\beta$ -catenin protein levels in H125 cells with or without HORMAD1 expression (**C**) and in NC and HORMAD1 knockdown H2170 cells (**D**) after transfection with  $\beta$ -catenin siRNA. All histograms representing indicated the results of three independent experiments. Mean  $\pm$  SEM from three independent experiments are shown. \*\*,  $p < 0.01$ ; \*\*\*,  $p < 0.001$ ; ns, not significant.
